# Supplementary material for: Self-Assembled Ru(II)-Coumarin Complexes for Selective Cell Membrane Imaging
Source: MDPI journal article supplement (doi:10.3390/pharmaceutics14112284), 2022-10-25
Supplement: s1 [file s1]

# Supplementary Materials: Self-Assembled Ru(II)-Coumarin Complexes for Selective Cell Membrane Imaging

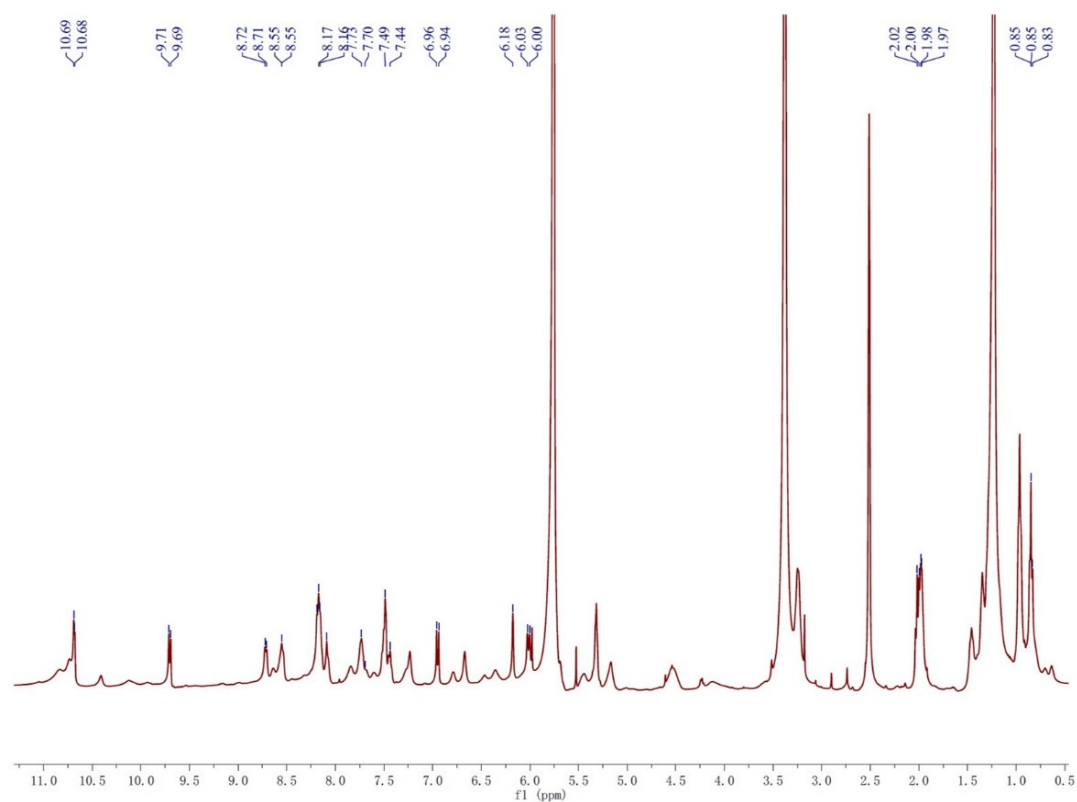

**Figure S1.**  $^1\text{H}$ NMR of Ru(II)-coumarin complexes.

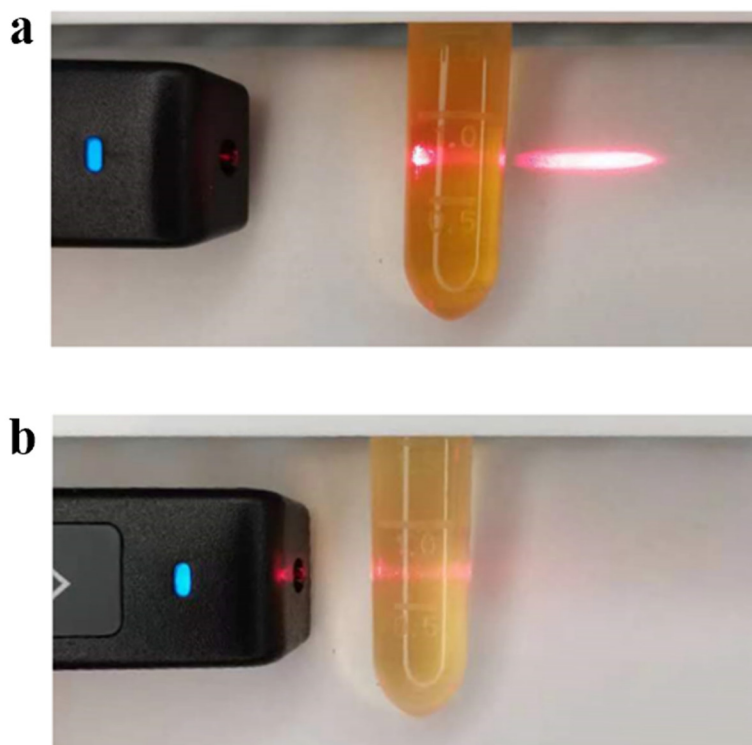

**Figure S2.** Tyndall effect of Ru(II)-Coumarin Complexes in DMSO (a) and RuCM NP (H<sub>2</sub>O) (b).

Tyndall effect exist in polar solvents (H<sub>2</sub>O) but vanished in non-polar solvents, which suggesting the hydrophobicity of the free molecule and the form of RuCM NPs in H<sub>2</sub>O.
